# Supplementary material for: Myoglobin-derived iron causes wound enlargement and impaired regeneration in pressure injuries of muscle
Source: eLife. 2023 Jun 2;12:e85633. doi: 10.7554/eLife.85633 (PMC10238093; doi:10.7554/eLife.85633)
Supplement: Figure 3—figure supplement 1—source data 1. [file elife-85633-fig3-figsupp1-data1.xlsx]

## Sheet: Sheet1
Tissue layer	Measurement (μm)		p-value
	Mb+/+	Mb−/−
Epidermis	19.6 ± 4.70	17.3 ± 3.90	0.209
Dermis	305 ± 42.4	272 ± 52.8	0.117
dWAT	107 ± 28.7	157 ± 47.5	0.023 (*)
Panniculus carnosus	112 ± 15.4	120 ± 37.4	0.545
Loose areolar tissue	71.3 ± 18.9	80.8 ± 25.2	0.391
Capillary density	1	1.17	0.046 (*)
Figure 3 figure supplement 1: Validation of Myoglobin knockout mice ... (E) Morphological comparison of the dorsal skinfolds (measured from H&E sections) in Mb+/+ and Mb−/− mice.
